# Supplementary material
Source: publisher site journal article supplement (https://www.dovepress.com/article/590486)
Supplement: Supplementary file 1 [file 590486_Supplementary%20Documents_for%20corrections_1_1.docx]

**Supplementary Document I. Full search strategy**

**MEDLine**

**Intervention**

1. (“Surgical”)
2. (“Postsurgical”)
3. (“Surgical procedures”)
4. (“Operative”)
5. (“Postoperative”)
6. (“Pain”)
7. (surg* or operati* or postsurg* or postoperati* or perioperati*)

**Population/Sample**

1. (pediatric* or paediatric* or child* or teen* or preteen* or adolescen* or youth* or youngster* or young person* or young people or juvenile*)
2. Limit to “child (4-18 years)”

**Clinical condition**

1. (“Chronic postsurgical pain” OR “Chronic postoperative pain”)
2. (“Chronic pain” OR “Recurrent pain” OR “OR “Persistent Pain OR “Pain disorders”)
3. (“Musculoskeletal Chronic pain” OR “Migraine” OR “Persistent Headache” OR “Persistent Neuropathic Chronic pain”)
4. (“Pain problems long term” OR “long term” OR recur* OR persist* or follow up or follow up or longitudinal or chronic*)

**Type of study**

1. (“Case-control” OR “Observational” OR “Cross-sectional”)
2. (“Prospective study”)
3. (“Follow-up studies” OR “Longitudinal studies”)
4. Limit to English language
5. French language
6. German language
7. Italian language
8. Spanish language
9. Limit to yr “2010-current”

**Outcomes**

1. (“Risk factors”)
2. (“Distress factors”)
3. (“Psychosocial factors”)
4. (“Predispose factors”)
5. (“Associates factors”)
6. “(Time factors”)

**EMBASE**

1. ‘surger’/exp OR ‘postoperative pain’/de
2. surg*:ab,ti or operati*:ab,ti or postsurg*:ab,ti or postoperati*:ab,ti or perioperati*:ab,ti
3. Surgery:Ink
4. Or/1-3
5. Exp pain/
6. pain*:ab,ti or headache*:ab,ti or migraine*:ab,ti or neuralgia*:ab,ti or ‘head ache*’:ab,ti
7. Or/5-6
8. ‘long term’:ab,ti or longterm:ab,ti or recur*:ab,ti or persist*:ab,ti or followup:ab,ti or ‘follow up’:ab,ti or longitudinal:ab,ti or chronic*:ab,ti
9. ‘Follow-up’/de or ‘longitudinal study’/de
10. Or/8-9
11. 4 and 7 and 10 and [English]/lim and [2010-2023]/py
12. 4 and 7 and 10 and [English]/lim and [2010-2023]/py and ([child]/lim or [school]lim)
13. pediatric*:ab,ti or paediatric*:ab,ti or child*:ab,ti or teen*:ab,ti or preteen*:ab,ti or adolescen*:ab,ti or youth*:ab,ti or youngster*:ab,ti or ‘young person*’:ab,ti or ‘young people’:ab,ti or juvenile*:ab,ti
14. 11 and 13
15. 12 or 14
16. 15 not 16
17. 17 and [embase]/kim not [medline]/lim

**PsycINFO**

1. Exp surgery
2. (surg* or operati* or postsurg* or postoperati* or perioperati*).mp
3. Or/1-2
4. Exp pain/
5. (pain* or headache* or head ache* or migraine* or neuralgia*).mp.
6. Or/3-4
7. (long term or longterm or recur* or persist* or followup or follow up or longitudinal or chronic*).mp.
8. Follow-up studies/ or longitudinal studies/
9. Or/7-8
10. 3 and 6 and 9
11. 3 and 6
12. (“followup study” or “longitudinal study”)
13. 10 or 12
14. English language
15. French language
16. German language
17. Italian language
18. Spanish language
19. yr=”2010-Current”
20. (100 childhood <birth to age 12 yrs> or 180 school age <age 6 to 12 yrs>)
21. (pediatric* or paediatric* or child* or teen* or preteen* or adolescen* or youth* or youngster* or young person* or young people or juvenile*).tw.
22. 15 and 17
23. 16 or 18

**WOS**

**Intervention**

#1 TS/TI/AB= (Surgery OR Surgical)

#2 TS/TI/AB = (Operative OR Operation)

#3 TS/TI/AB = (“Postoperative” OR “Postsurgical” OR “Post-operative” OR “Post-surgical” OR “Post-surgery”)

**Population/Sample**

     #4TS/TI/AB= (pediatric* or paediatric* or child* or teen* or preteen* or adolescen* or youth* or youngster* or young person* or young people or juvenile*)

#5TS/TI/AB= (4-18 years)

**Clinical condition**

    #7TS= (Chronic pain OR Recurrent pain OR Persistent Pain OR Pain disorders)

    #8 TS= (Surgery Chronic pain OR Persistent Surgery Pain OR Persistent Neuropathic Pain OR Neurophatic Chronic pain)

  #9 TS= (“Chronic postsurgical pain” OR “Chronic postoperative pain”)

#10 TS= (“Pain problems long term” OR “long term” OR recur* OR persist* or follow up or follow up or longitudinal or chronic*)

**Type of study**

    #11 (Case-control OR Observational OR Cross-sectional)

    #12(Prospective study”)

    #13 Limit to14 to English language

    #14 Limit to 20 to yr “2010-current”

**Outcomes**

    #15 TS= (Risk factors)

#16 TS= (Distress factors)

#17 TS= (Psychosocial factors)

    #18 TS= (Predispose factors)

    #19 TS= (Associates factors)

    #20 TS= (Time factors)

**Cochrane Database**

**Intervention**

Ortopaedics & Trauma [Mesh Term] -All tree

Surgery [Mesh Term] -All tree

**Population/Sample**

Child health [Mesh Term] -All tree

Pediatrics [Mesh Term] -All tree

Pregnanacy & childbirth [Mesh Term] -All tree

**Clinical condition**

Pain & Anesthesia [Mesh Term] -All tree

Chronic Pain [Mesh Term] -All tree

**Outcomes**

Psychological Distress [Mesh Term] -All tree

Fear [Mesh Term] -All tree

Anxiety [Mesh Term] -All tree

Anxiety Disorders [Mesh Term] -All tree

Mood Disorders [Mesh Term] -All tree

Diagnosis [Mesh Term] -All tree

**Supplementary Document II. Risk of bias analysis with reasons**

| **Study** | **1. Study Participation** | | **2. Study Attrition** | | **3. Prognostic Factor Measurement** | | **4. Outcome Measurement** | | **5. Study Confounding** | | **6. Statistical Analysis and Reporting** | |
| --- | --- | --- | --- | --- | --- | --- | --- | --- | --- | --- | --- | --- |
|  | Judgement | Reason | Judgement | Reason | Judgement | Reason | Judgement | Reason | Judgement | Reason | Judgement | Reason |
| **Ceniza-Bordallo et al., 2025 3** | Low | Study has a good description of recruitment, inclusion and exclusion criteria, and sampling time frame. | Moderate | Authors did not complete an analysis comparing completers and non-completers and did not explain the reason of non-ending the following period | Low | They use validates scales to assess prognostics factors and in the same way for all sample | Low | The outcome its measured in the same way to all participants. | Low | The analyses of sex and age influences | Low | The realize a trajectories analysis based on pain intensity. The carry out the multivariant analysis with all prognostic factors’ asses in the study and it’s controlled by confounding factors. |
| **Sieberg et al., 2023 43** | Moderate | They don't provide a period of sampling recruitment. The study provides a good description of eligibility criteria | Moderate | Authors did not complete an analysis comparing completers and non-completers and did not explain the reason of non-ending the following period | Low | They use validates scales to assess prognostics factors and in the same way for all sample | Low | The outcome its measured in the same way to all participants. | Low | The analyses of sex and age influences | Moderate | The authors carry out the correlations, mean differences and one-way analysis of variance (ANOVA) was performed to compare the effect of QST and PCS-C scores on postoperative back pain scores before and after surgery |
| **Ellyson et al., 2022 47** | Low | Study has a good description of recruitment, inclusion and exclusion criteria, and sampling time frame. | Low | Authors provides information about study attrition and baseline characteristics. They analyze completers and non-completers differences in pain intensity reports using Little´s test | Low | They use validates scales to assess prognostics factors and in the same way for all sample | Low | The outcome its measure in the same way to all participants. They realize trajectories analysis with declined pain and high and persistent pain | Low | They control the multivariant analysis by sex and analyze differences into both trajectories in age | Low | The realize a trajectories analysis based on pain intensity. The carry out the multivariant analysis with all prognostic factors’ asses in the study and it’s controlled by confounding factors. |
| **Fraser et al., 2022 42** | Low | Study has a good description of recruitment, inclusion and exclusion criteria, and sampling time frame. | Low | Authors provides information about study attrition and baseline characteristics. They analyze completers and non-completers differences in pain intensity reports using Little´s test | Low | They use validates scales to assess prognostics factors and in the same way for all sample | Low | The outcome its measure in the same way to all participants. They realize trajectories analysis with declined pain and high and persistent pain | Low | They control the multivariant analysis in trajectories by baseline pain covariables | Low | The realize a trajectories analysis based on pain intensity. The carry out the multivariant analysis with all prognostic factors’ asses in the study and it’s controlled by confounding factors. |
| **Beeckman et al., 2021 41** | Moderate | The study provides a good description of eligibility criteria but limited information about the sampling time, and place. | Moderate | Authors did not complete an analysis comparing completers and non-completers and did not explain the reason of non-ending the following period | Low | They use validates scales to assess prognostics factors and in the same way for all sample | High | The outcome its measure in the same way to all participants but They don´t provide information about when the outcome was assess in the follow-up period (6 or 12 months) | Low | They control in analysis by sex and age | Low | They realize univariant analysis and not showing statistical significance |
| **Bailey et al., 2021 61** | Low | The study provides a good description of the recruitment (Inclusion criteria) into two participants studies included and sampling time frame | Low | The authors provide information about study attrition of both studies included and baseline characteristics. They analyze completers and non-completers differences in sex and age. | Low | They use validates scales to assess prognostic factors and in the same way for all samples. They used a new physical activity system correctly validated, | Low | The outcome is measure in the same way for all participants. They stabilized a pain intensity and HRQoL cut off. | Low | They analyzed differences into sex, age and catastrophizing. | Low | The authors only carry out mean differences (t-test and X2) They carry our multivariant analysis into 2 weeks of measurement and CPSP |
| **Chidambaram et al., 2021 50** | Low | Study has a good description of recruitment, inclusion and exclusion criteria, and sampling time frame. | Moderate | Authors did not complete an analysis comparing completers and non-completers. | Low | They use validates scales to assess prognostics factors and in the same way for all sample | Low | The outcome its measured in the same way for all participants. This study includes chronic pain lower right abdominal pain (CPAP) | Low | They analyzed differences into sex and age. | Low | They carry out a multivariant logistic regression to identify the relationship into variables and chronic pain |
| **Rabbitts et al., 2021 46** | Low | Study has a good description of recruitment, inclusion and exclusion criteria, and sampling time frame. | Moderate | Authors provides information about study attrition and baseline characteristics.  Authors did not complete an analysis comparing completers and non-completers. | Low | They use validates scales to assess prognostics factors and in the same way for all sample. | Low | The outcome is measure in the same way for all participants. They stabilized a pain intensity and HRQoL cut off. | Low | They include in the model the baseline pain variables and parent/families’ variables | Low | They carry out a multivariant logistic regression |
| **Palabiyik et al., 2021 59** | Low | Study has a good description of recruitment, inclusion and exclusion criteria, and sampling time frame. | Moderate | There is not information about participants lost during the follow-up period. | Low | They use validates scales to assess prognostics factors and in the same way for all sample | High | The outcome is measured the same way for all participants, but they use a <2 points in VAS which is a cut-off not widely used in this specific sample. They don´t provide information about when the outcome was assess in the follow-up period | Moderate | They analyzed differences by sex, age, and race, but they didn’t include it’s into regressions models. | Moderate | They carry out a univariant logistic regression to identify the relationship into variables and chronic pain, but they didn´t control by any covariables. |
| **Rabbitts et al., 2020 14** | Low | Study has a good description of recruitment, inclusion and exclusion criteria, and sampling time frame. | Moderate | Authors did not complete an analysis comparing completers and non-completers. | Low | They use validates scales to assess prognostics factors and in the same way for the whole sample | Low | The outcome its measure in the same way to all participants. | Low | They had analyze the variables of confounding describes in literature (age and sex) | Low | They had complete analyze but they don’t realize a uni-multivariant model into baseline factor and 6 months follow-up status. That could be more interesting to assess different risk but not introduce any potential bias in the statistical analysis |
| **Perry et al., 2020 48** | Low | Study has a good description of recruitment, inclusion and exclusion criteria, and sampling time frame. | High | The authors provide all information about study attrition, and they analyze differences between completers and non-completers but due to changes in participants' size, it’s impossible to make sure if the prognostic factors were assessed in all participants and surgery procedure isn´t realized in all participants. | Low | They use validates scales to assess prognostics factors and in the same way for whole sample | Moderate | The outcome its measure in the same way to all participants but the sample changes during the follow-up period. Its impossible to know the exact incidence of the outcome (CPSP) | Low | They had large analyze the variables of confounding describes in literature, sex and age. | High | The analyses were carried out only into prognostic factors and recall bias, it's impossible to analyze their relationship to CPSP. |
| **Ocay et al., 2020 62** | Low | Study has a good description of recruitment, inclusion and exclusion criteria, and sampling time frame. | High | Author provide all information about study attrion and they analyze diferences between completers and non-completers but due to changes participants size its imposible to make sure that factor prognotic its was assess in all participants and surgery procedure it´nt realize in all participants. | Low | They use validates scales to assess prognostics factors and in the same way for all sample | Moderate | The outcome its measure in the same way to all participants but the sample changes during the follow-up period. Its imposible to know the exact incidence of CPSP | Low | They had large analyze the variables of counfunding descrives in literature | High | They had complete analyze but they don´t realize an analysis only for participants exposes at initial moment of the study, its imposible to understand the relationship betwenn progonostic factor and outcome. |
| **Noel et al., 2019 63** | High | Study has a description of inclusion and exclusion criteria, but not for the number of participants approach and sampling time frame. | Moderate | Authors did not complete an analysis comparing completers and non-completers and did not explain the reason of non-ending the following period | Low | They use validates scales to assess prognostics factors and in the same way for all sample | Low | The outcome its measure in the same way to all participants. | Low | They had large analyze the variables of counfunding descrives in literature | Low | They had complete analyze |
| **Rosenbloom et al., 2019 64** | Low | Study has a good description of recruitment, inclusion and exclusion criteria, and sampling time frame. | Moderate | Authors provide information about the lost buy they don´t realize an analysis comparing completers and non-completers. | Low | They use validates scales to assess prognostics factors and in the same way for all sample | Low | The outcome its measure in the same way to all participants. | Low | They had large analyze the variables of confounding describes in literature: sex, age, and pin intensity | Low | They analyze opioid consummation trajectories |
| **Chidambaran et al., 2019 51** | High | Study has a good description of recruitment, and sampling time frame is reported. Study has a not good description of inclusion, and exclusion criteria. | Moderate | Authors provide information about the lost buy they don´t realize an analysis comparing completers and non-completers. | Low | They use validates scales to assess prognostics factors and in the same way for all sample | Low | The outcome its measure in the same way to all participants. | High | They had large analyze the variables of confounding describes in literature: sex, age, and pin intensity | NA | – |
| **Li et al., 2019 65** | Low | Study has a good description of recruitment, inclusion and exclusion criteria, and sampling time frame. | Low | Author provide information about study attrion and baseline characteristics. They analyze completers and non completers diferences | Low | They use validates scales to assess prognostics factors and in the same way for all sample | Low | The outcome its measure in the same way to all participants. | Low | They had large anlyze the variables of counfunding descrives in literature | Low | They had complete analyze and they analyze pain interference as outcome. |
| **Knudsen et al., 2018 60** | Low | Study has a good description of recruitment, inclusion and exclusion criteria, and sampling time frame.The provide partial baseline outcomes and a littel description participants characteristics. | Low | Author provide all information about study attrion and provide partial information about lost in the follow-up period butnot reasons. Finally, they ajusted into their power calculations and carry out a random analys for completers | Low | They use validates scales to assess prognostics factors and in the same way for all sample | Low | The outcome its measure in the same way to all participants. | Low | They had large anlyze the variables of counfunding descrives in literature | Low | They had complete analyze |
| **Voepel-Lewis et al., 2018 69** | Low | Study has a good description of recruitment, inclusion and exclusion criteria, and sampling time frame. | Moderate | Author provide all information about study attrion but they don´t provide completers noncompleters analysis. | Low | They use validates scales to assess prognostics factors and in the same way for all sample | Low | The outcome its measure in the same way to all participants. | Low | They had large analyze the variables of counfunding descrives in literature | Low | They had complete analyze |
| **Chidambaran & Ding et al., 2017 53** | Low | Study has a good description of recruitment, inclusion and exclusion criteria, and sampling time frame. | Moderate | Author provide all information about study attrion but they don´t provide completers noncompleters analysis. | Low | They use validates scales to assess prognostic factors. | Low | The outcome its measure in the same way to all participants and with a valid, reliable scale. | Low | They didn´t describe or analyze potential cofouding factors. | Moderate | They realize a univariante analysis and logistic regresion for Neurophatic CPSP |
| **Chidambaran & Zhang et al., 2017 52** | High | They provide clinical sample description and recruitment in the diferentts studies. They provide a good description of eligibility criteria and baseline outcomes. There are a not complete description of sample. They don´t provide information about period of recruitment and the number of participants contacted. | High | They don´t provide information about losts. There are not reason data about lost follow-up and they provide completers non completers analysis | Low | They use validates scales to assess prognostics factors. | Low | The outcome its measure in the same way to all participants. | Moderate | They only consider contro memory child-parent asociation by baseline pain catastrophizing. | High | They only analyzed relationship into child and parent reports. They dont have univariable and multivariante analysis. |
| **Julien-Marsollier et al., 2017 58** | Low | Study has a good description of recruitment, inclusion and exclusion criteria, and sampling time frame. | Moderate | Author provide all information about study attrion, the losts and their reasons. The don´t analyze diferences betwen completers and noncompleters. | Low | They use validates scales to assess Factors arround pain. | Low | The outcome its measure in the same way to all participants. | Low | They had large analyze the variables of counfunding descrives in literature | Low | They had complete analyze |
| **Noel et al., 2017 63** | Low | Study has a good description of recruitment, inclusion and exclusion criteria, and sampling time frame. | Moderate | Author provide all information about study attrion. Not provided information about the losts. It not provide reason to droppout and there is not an diferences analysis to completers and noncompleters. | Low | They use validates scales to assess Factors arround pain. | Low | The outcome its measure in the same way to all participants. | Low | They had large analyze the variables of counfunding descrives in literature | Low | They had complete analyze |
| **Batoz et al., 2016 68** | Moderate | Study has a good description of recruitment and a little inclusion criterion however there aren´t description about exclusion criteria. | Moderate | Author provide all information about study attrion but not for losts during attrition and follow-up. It not provide reason to droppout buy there is an analysis to completers and noncompleters. | Moderate | It used the same measure to prognostic factor and to outcome (SRS). | Moderate | The prognostic factors were evaluated in the same way to all sample and are valid and reliable to the sample. There is a not clear prognotic factors definition or any referece to sopport the decision. | Moderate | They didn´t describe or analyze potential cofouding factors. | Moderate | They use an univariable analysis and trajectories but no multivariante analisis |
| **Rabbitts et al., 2015 81** | High | They dont provide period of the sampling recruiment, baseline clinical outcomes. They provide a short description of participants. | High | There are not reasons data about lost follow-up, there aren´t analysis of completers and not-completers, there aren´t information about rate of response. | Low | The prognostic factors were evaluated in the same way to all sample. There is a clear prognotic factors definition. The method to assess prognostic factor are valid and reliable. | Moderate | The outcome its measure in the same way to all participants. There is not a clear defintion of pain cuttoffs point fot the pain in SRS. It used a validate scales to assess outcomes and the method and setiing are the same to all sample | Low | They had analyze the variables of counfunding descrives in literature (sex and age) | High | They don´t have univariable and multivariante analyze. |
| **Sieberg et al., 2013 40** | Low | Study has a good description of participants inclusion, and eligibility criteria | Low | Author provide all information about study attrion and showed not diferences between completers and non-completers participants. | Low | In the study all factors were clearly described, were analyzed in all sample and with the same validate scales. | Low | The outcome its measure in the same way to all participants with a validated scale in this population, and there was a clear description of it. | Moderate | The authors had large analyze the variables of confounding described in literature in the children sample, but not for the parent sample | Low | Statistical analysis answers the research question.They had complete analyze. |
| **Bastrom et al., 2013 55** | Low | Study has a good description of participants inclusion, and eligibility criteria | Low | Author provide all information about study attrion and showed not diferences between completers and non-completers participants. | Low | In the study all factors were clearly described, were analyzed in all sample and with the same validate scales. | Low | The outcome its measure in the same way to all participants with a validated scale in this population, and there was a clear description of it. | Moderate | The authors had large analyze the variables of confounding described in literature in the children sample, but not for the parent sample | Low | Statistical analysis answers the research question.They had complete analyze. |
| **Pagé & Stinson et al., 2013 66** | High | They dont provide period of the sampling recruiment, all baseline clinical outcomes. They provide a short description of participants. | High | There are not reason data about lost follow-up, there aren´t analysis of completers and not-completers, there arent information about rate of response. | Low | The authors provide a clear description of outcome/factor analyzed . They analyzed same factor/outcome for all sample. | Moderate | The authors provide a clear description of instrument used. The outcome its measure in the same way to all participants. The scales used are valid and realibile to this specific sample. They don´t provide information about completion of measures. Follow-up time points are described. | Hight | They didn´t describe or analyze potential cofouding factors. | High | The authors only used a univariate analysis it isn´t a apropiate model for study all outcomes or to provide information more precisive about research question. |
| **Pagé & Campbell et al., 2013 67** | Low | Study has a good description of recruitment, inclusion and exclusion criteria, and sampling time frame. | High | There are not reason about lost follow-up. There are not analysis to completers and not-completers, there are not information about rate of response. | Low | The study provide a good information about the outcomes/factors assessed. It analyzed the same factor/outcome for all sample. | Moderate | The authors not used specific valid Scale to assess Pain interference, social activities, school fuctioning or Sleep in this population. There is a good explanation about the scales used. The outcome its measure in the same way to all participants. | Hight | The authors didn´t include a confunding factors in baseline or follow-up period. | High | Although statistical analysis helps to understand some of the main questions raised in the study, there are many others that cannot be answered with the analysis used. Not sophisticated enough to fully answer the research question |
| **Landman et al., 2011 56** | High | They dont provide period of the sampling recruiment, all baseline clinical outcomes. They provide a short description of participants. | High | There are not reason about lost follow-up. There are not analysis to completers and not-completers, there are not information about rate of response. | Moderate | It used the same measure to prognostic factor and to outcome | High | The outcome is measured the same way for all participants, | Hight | The authors didn´t include a confunding factors in baseline or follow-up period. | High | Although statistical analysis helps to understand some of the main questions raised in the study, there are many others that cannot be answered with the analysis used. Not sophisticated enough to fully answer the research question |
| **Fortier et al., 2011 57** | Low | Study has a good description of recruitment, inclusion and exclusion criteria, and sampling time frame. | High | There are not reason about lost follow-up. There are not analysis to completers and not-completers, there are not information about rate of response. | Moderate | It used the same measure to prognostic factor and to outcome | High | The outcome is measured the same way for all participants, | Hight | The authors didn´t include a confunding factors in baseline or follow-up period. | High | Although statistical analysis helps to understand some of the main questions raised in the study, there are many others that cannot be answered with the analysis used. Not sophisticated enough to fully answer the research question |

**Supplementary Document III. Publication bias heterogeneity funnel plot for the association between prognostic factors and CPSP.**

Age 3 months

Age: 6 months

Age: 12 months

Sex: 3 months

Sex: 6 months

Child Pain Intensity: 3 months

Child Pain Intensity: 6 months

Child Pain Intensity: 12 months

Child Pain Catastrophizing: 3 months

Child Anxiety Sensitivity: 3 months

Child Anxiety Sensitivity: 12 months

Child Anxiety: 12 months

Parent Pain Catastrophizing: 3 months

Parent Pain Catastrophizing 12 months

Parent Pain Anxiety: 3 months

Parent Pain Anxiety: 12 months
